# Supplementary material
Source: HighWire-hosted journal article supplement (https://cmajopen-stage.highwire.org/highwire/filestream/85761/field_highwire_adjunct_files/0/2020-0234-1-at.pdf)
Supplement: 2020-0234-1-at.pdf [file 2020-0234-1-at.pdf]

**Characterization of cost inputs divided into Direct (Staff, Travel, Living) and Indirect (Opportunity costs of travel).**

| Type of Cost                                                  | Clinic Model | St. Theresa Point | Churchill | Calculation                                                                                                                                                                    |
|---------------------------------------------------------------|--------------|-------------------|-----------|--------------------------------------------------------------------------------------------------------------------------------------------------------------------------------|
| <b>Staff</b>                                                  |              |                   |           | <i>* based on data extraction as described in Methods.</i>                                                                                                                     |
| Attending physician conventional billing per clinic visit     | Conventional | \$194             | \$203     | <i>Services provided to patients* valued using conventional billing codes from the Manitoba Physician's Manual,<sup>1</sup> divided by number of clinic visits</i>             |
| Attending outreach stipend per clinic visit                   | Outreach     | \$237             | \$431     | <i>Stipends paid by Ongomiizwin health services (\$2444/clinic*) divided by number of clinic visits</i>                                                                        |
| Resident physician outreach salary cost per clinic visit      | Outreach     | \$14              | \$26      | <i>8hr work day per clinic + 4 hrs* of planning/wrap-up per clinic multiplied by resident \$37/hr salary,<sup>2-3</sup> divided by number of clinic visits</i>                 |
| Conventional clinic nurse cost per clinic visit               | Conventional | \$11              | \$11      | <i>15 mins* of clinic time per patient multiplied by nurse \$42/hr salary.<sup>4</sup></i>                                                                                     |
| Front desk administration cost per clinic visit               | Both         | \$4               | \$4       | <i>10 mins* of time per patient multiplied by administrative staff \$26/hr salary.<sup>4</sup></i>                                                                             |
| Outreach general administration cost per clinic visit         | Outreach     | \$3               | \$5       | <i>1 hr* of time per outreach clinic multiplied by staff \$30/hr salary* divided by number of clinic visits</i>                                                                |
| <b>Travel</b>                                                 |              |                   |           |                                                                                                                                                                                |
| Flight (airplane) cost per person                             | Both         | \$670             | \$1,274   | <i>2 way trip, averaged from receipts from outreach clinics*</i>                                                                                                               |
| Winnipeg taxi cost per trip                                   | Both         | \$37              | \$41      | <i>2 way trip typical cost with tip* from tertiary hospital to respective airports</i>                                                                                         |
| Community based travel unshared per person (base case)        | Both         | \$195             | -         | <i>2 way trip airport to community in St. Theresa Point seasonal cost per person via boat \$40 x 0.4 of year* and helicopter \$914 x 0.2 of year*</i>                          |
| Community based travel shared per clinic visit (base case)    | Both         | \$2               | \$51      | <i>2 way trip airports to community in St. Theresa Point using health centre vehicle using standard mileage costs,<sup>5</sup> Churchill flat rate taxi fare*</i>              |
| Community based travel unshared per person (scenario 1)       | Both         | \$15              | -         | <i>2 way trip airport to community in St. Theresa Point seasonal cost per person via boat \$40 x 0.5 of year*</i>                                                              |
| Community based travel shared per clinic visit (scenario 1)   | Both         | \$3               | -         | <i>2 way trip airport to community in St. Theresa Point using health centre vehicle using standard mileage costs<sup>5</sup></i>                                               |
| Flight (air ambulance) cost per clinic visit (scenario 2)     | Conventional | \$24,000          | \$24,000  | <i>2 way trip, lower range of cost estimate used (ranges identified \$12,00-20,000 per one-way trip)*</i>                                                                      |
| <b>Living</b>                                                 |              |                   |           |                                                                                                                                                                                |
| Patient accommodation cost per conventional clinic visit      | Conventional | \$168             | \$168     | <i>Nightly cost of double queen room at hotel adjacent to tertiary hospital.<sup>6</sup></i>                                                                                   |
| Food cost per person per day                                  | Both         | \$51              | \$51      | <i>Stipend typical of Ongomiizwin Health Services and provincial health services provided to staff and patients*</i>                                                           |
| <b>Indirect</b>                                               |              |                   |           |                                                                                                                                                                                |
| Opportunity cost per conventional clinic visit                | Conventional | \$613             | \$519     | <i>12 hours (1.5 days) for all patients and attendants multiplied by \$23/hr average employment income for adult in Canada,<sup>7</sup> divided by number of clinic visits</i> |
| Opportunity cost resident physician per outreach clinic visit | Outreach     | \$8               | \$11      | <i>7 hrs travel for St. Theresa Point* and 5 hrs travel for Churchill* multiplied by resident \$37/hr salary,<sup>2-3</sup> divided by number of clinic visits</i>             |

1. The Minister of Health. The Manitoba Physician's Manual. Winnipeg (MB); 2020. 469 p. Available: <https://www.gov.mb.ca/health/documents/physmanual.pdf> (accessed 2020 Apr 14).
2. Professional Association of Residents and Interns of Manitoba and Winnipeg Regional Health Authority. COLLECTIVE AGREEMENT July 1, 2014 to June 30, 2018. Winnipeg (MB); 2015. 54 p. Available: <https://parim.org/wp-content/uploads/2015/06/PARIM-Collective-Agreement-2014-2018-OSB.pdf> (accessed 2019 Sep 14).
3. Professional Association of Residents and Interns of Manitoba and Shared Health. COLLECTIVE AGREEMENT July 1, 2018 to June 30, 2021. Winnipeg (MB); 2018. 46 p. Available: <https://www.prim.org/wp-content/uploads/2020/06/2018-2021-PARIM-Collective-Agreement-Final-signed-3.pdf> (accessed 2020 Jul 13).
4. Deloitte. Schedule of Compensation for the Manitoba Public Sector Compensation Disclosure Act of Winnipeg Regional Health Authority. Winnipeg (MB); 2018. 172 p. Available: <https://wrha.mb.ca/files/public-compensation-disclosure-2018.pdf> (accessed 2020 Apr 14).
5. Driving Costs Calculator. Canadian Automobile Association. Available: <https://carcosts.caa.ca/> (accessed 2019 Sep 14).
6. Canad Inns. Canad Inns Online Reservations Health Sciences. 2019. Available: <https://canadinns-res.tng-secure.com/index.php?propid=723a233b-733f-46da-8900-5cc4534b8004&mcode=> (accessed 2019 Sep 14).
7. Statistics Canada. Table 11-10-0239-01 Income of individuals by age group, sex and income source, Canada, provinces and selected census metropolitan areas. Ottawa (ON): Statistics Canada; 2018. Available: <https://www150.statcan.gc.ca/t1/tbl1/en/tv.action?pid=1110023901> (accessed 2020 Apr. 29).
